# Supplementary material
Source: PubMed Central journal article supplement (PMC3375344)
Supplement: NIHMS357395-supplement-supplement_1.pdf [file NIHMS357395-supplement-supplement_1.pdf]

Supplementary table S1: Unique peptides of epidermal samples from normal skin/normal grafts and LI skin/LI grafts.

| #  | Protein   | Accession Number | MW      | normal skin |     | normal graft |     | LI skin |      | LI graft |      |      |
|----|-----------|------------------|---------|-------------|-----|--------------|-----|---------|------|----------|------|------|
|    |           |                  |         | NS1         | NS2 | NG1          | NG2 | R.T.    | U.H. | LIG1     | LIG2 | LIG3 |
| 1  | KRT10     | splP13645I       | 59 kDa  | 111         | 118 | 128          | 111 | 44      | 49   | 87       | 76   | 82   |
| 2  | KRT1      | splP04264I       | 66 kDa  | 94          | 90  | 89           | 92  | 40      | 47   | 60       | 53   | 62   |
| 3  | DSP       | splP15924I       | 332 kDa | 77          | 28  | 40           | 36  | 146     | 128  | 135      | 136  | 137  |
| 4  | KRT2      | splP35908I       | 65 kDa  | 59          | 58  | 98           | 62  | 24      | 19   | 18       | 14   | 15   |
| 5  | KRT6A     | splP02538I       | 60 kDa  | 32          | 18  | 41           | 36  | 21      | 8    | 61       | 52   | 50   |
| 6  | KPRP      | splQ5T749I       | 64 kDa  | 35          | 39  | 35           | 34  | 70      | 59   | 51       | 55   | 53   |
| 7  | FLG       | splP20930I       | 435 kDa | 74          | 110 | 76           | 84  | 10      | 13   | 13       | 12   | 16   |
| 8  | JUP       | splP14923I       | 82 kDa  | 30          | 14  | 13           | 19  | 51      | 38   | 55       | 56   | 53   |
| 9  | KRT14     | splP02533I       | 52 kDa  | 35          | 23  | 32           | 33  | 13      | 14   | 58       | 43   | 44   |
| 10 | FLG2      | splQ5D862I       | 248 kDa | 42          | 113 | 77           | 77  | 46      | 33   | 13       | 13   | 12   |
| 11 | DSG1      | splQ02413I       | 114 kDa | 25          | 19  | 14           | 24  | 53      | 43   | 45       | 39   | 44   |
| 12 | KRT5      | splP13647I       | 62 kDa  | 34          | 31  | 30           | 30  | 15      | 15   | 30       | 27   | 26   |
| 13 | POF1B     | splQ8WV4I        | 69 kDa  | 14          | 2   | 3            | 2   | 31      | 31   | 22       | 28   | 25   |
| 14 | AHNAK     | splQ09666I       | 629 kDa | 74          | 25  | 8            | 42  | 55      | 31   | 23       | 6    | 16   |
| 15 | KRT16     | splP08779I       | 51 kDa  | 15          | 2   | 18           | 19  | 6       | 0    | 31       | 25   | 29   |
| 16 | PKP1      | splQ13835I       | 83 kDa  | 24          | 2   | 7            | 23  | 32      | 29   | 30       | 28   | 28   |
| 17 | SERPINB3  | splP29508I       | 45 kDa  | 20          | 20  | 21           | 18  | 7       | 2    | 17       | 14   | 18   |
| 18 | LOR       | splP23490I       | 26 kDa  | 2           | 2   | 0            | 2   | 29      | 24   | 16       | 18   | 22   |
| 19 | KRT17     | splQ04695I       | 48 kDa  | 11          | 7   | 16           | 10  | 7       | 0    | 23       | 22   | 21   |
| 20 | SPRR2B    | splP35325I       | 8 kDa   | 4           | 3   | 4            | 2   | 5       | 6    | 6        | 7    | 6    |
| 21 | XP32      | splQ5T750I       | 26 kDa  | 9           | 9   | 10           | 7   | 18      | 15   | 15       | 16   | 12   |
| 22 | S100A8    | splP05109I       | 11 kDa  | 5           | 4   | 6            | 3   | 3       | 4    | 6        | 5    | 5    |
| 23 | GAPDH     | splP04406I       | 36 kDa  | 17          | 15  | 11           | 13  | 5       | 7    | 13       | 13   | 15   |
| 24 | KRT77     | splQ7Z794I       | 62 kDa  | 16          | 19  | 18           | 17  | 0       | 3    | 10       | 10   | 9    |
| 25 | ACTG1     | splP63261I       | 42 kDa  | 8           | 3   | 2            | 0   | 8       | 4    | 20       | 20   | 19   |
| 26 | S100A9    | splP06702I       | 13 kDa  | 7           | 4   | 6            | 3   | 0       | 2    | 9        | 6    | 8    |
| 27 | BLMH      | splQ13867I       | 53 kDa  | 12          | 19  | 12           | 16  | 5       | 9    | 12       | 8    | 14   |
| 28 | CASP14    | splP31944I       | 28 kDa  | 14          | 13  | 13           | 16  | 5       | 5    | 9        | 9    | 9    |
| 29 | HAL       | splP42357I       | 73 kDa  | 4           | 11  | 16           | 17  | 6       | 5    | 14       | 15   | 20   |
| 30 | SPRR1A    | splP35321I       | 10 kDa  | 4           | 3   | 4            | 5   | 5       | 5    | 7        | 6    | 5    |
| 31 | ANXA2     | splP07355I       | 39 kDa  | 11          | 9   | 13           | 11  | 2       | 5    | 14       | 12   | 15   |
| 32 | TGM3      | splQ08188I       | 77 kDa  | 16          | 16  | 17           | 15  | 2       | 9    | 9        | 8    | 5    |
| 33 | S100A7    | splP31151I       | 11 kDa  | 11          | 10  | 9            | 4   | 3       | 3    | 8        | 9    | 8    |
| 34 | DSC1      | splQ08554I       | 100 kDa | 7           | 0   | 0            | 10  | 16      | 17   | 12       | 8    | 10   |
| 35 | KRT78     | splQ8N1N4I       | 57 kDa  | 10          | 12  | 12           | 9   | 8       | 9    | 11       | 8    | 9    |
| 36 | AZGP1     | splP25311I       | 34 kDa  | 7           | 10  | 8            | 8   | 0       | 3    | 6        | 9    | 10   |
| 37 | IVL       | splP07476I       | 68 kDa  | 16          | 3   | 3            | 11  | 15      | 5    | 14       | 5    | 10   |
| 38 | KRT6C     | splP48668I       | 60 kDa  | 2           | 0   | 9            | 8   | 0       | 0    | 12       | 8    | 10   |
| 39 | SERPINB12 | splQ96P63I       | 46 kDa  | 6           | 10  | 10           | 8   | 6       | 3    | 6        | 4    | 5    |
| 40 | KRT80     | splQ6KB66I       | 51 kDa  | 8           | 11  | 11           | 7   | 6       | 6    | 10       | 11   | 11   |
| 41 | PKM2      | splP14618I       | 58 kDa  | 5           | 2   | 0            | 2   | 0       | 0    | 20       | 14   | 23   |
| 42 | IDE       | splP14735I       | 118 kDa | 7           | 0   | 0            | 0   | 4       | 6    | 17       | 14   | 16   |
| 43 | COL1A1    | splP02452I       | 139 kDa | 0           | 2   | 0            | 0   | 4       | 29   | 0        | 0    | 0    |
| 44 | TGM1      | splP22735I       | 90 kDa  | 17          | 10  | 10           | 11  | 0       | 0    | 0        | 4    | 0    |
| 45 | A2ML1     | splA8K2U0I       | 161 kDa | 6           | 17  | 13           | 5   | 4       | 0    | 4        | 2    | 4    |
| 46 | LCE1C     | splQ5T751I       | 12 kDa  | 2           | 2   | 0            | 0   | 5       | 4    | 9        | 8    | 8    |
| 47 | KRT13     | splP13646I       | 50 kDa  | 0           | 0   | 11           | 16  | 0       | 0    | 5        | 2    | 3    |
| 48 | MYH9      | splP35579I       | 227 kDa | 7           | 0   | 0            | 0   | 0       | 0    | 22       | 15   | 17   |
| 49 | SPRR1B    | splP22528I       | 10 kDa  | 0           | 0   | 0            | 0   | 2       | 2    | 2        | 2    | 3    |
| 50 | COL1A2    | splP08123I       | 129 kDa | 2           | 0   | 0            | 0   | 3       | 15   | 0        | 0    | 0    |
| 51 | KRT23     | splQ9C075I       | 48 kDa  | 4           | 4   | 6            | 4   | 2       | 0    | 7        | 5    | 6    |
| 52 | GGCT      | splO75223I       | 21 kDa  | 6           | 3   | 5            | 9   | 0       | 4    | 3        | 2    | 4    |
| 53 | HSPB1     | splP04792I       | 23 kDa  | 6           | 0   | 0            | 0   | 4       | 2    | 5        | 4    | 5    |
| 54 | TPI1      | splP60174I       | 27 kDa  | 7           | 6   | 2            | 2   | 0       | 0    | 8        | 8    | 7    |
| 55 | SERPINB4  | splP48594I       | 45 kDa  | 5           | 0   | 3            | 5   | 0       | 0    | 7        | 5    | 7    |
| 56 | ARG1      | splP05089I       | 35 kDa  | 6           | 2   | 9            | 10  | 0       | 0    | 6        | 2    | 3    |
| 57 | EEF1A1    | splP68104I       | 50 kDa  | 4           | 0   | 0            | 3   | 2       | 0    | 6        | 6    | 8    |

|     |           |            |         |   |   |   |   |   |   |    |    |    |
|-----|-----------|------------|---------|---|---|---|---|---|---|----|----|----|
| 58  | SPRR2G    | splQ9BYE4I | 8 kDa   | 2 | 0 | 0 | 0 | 0 | 2 | 2  | 3  | 2  |
| 59  | ENO1      | splP06733I | 47 kDa  | 5 | 0 | 0 | 2 | 0 | 2 | 11 | 7  | 11 |
| 60  | TXN       | splP10599I | 12 kDa  | 4 | 4 | 6 | 4 | 0 | 0 | 0  | 2  | 3  |
| 61  | LGALS7    | splP47929I | 15 kDa  | 6 | 2 | 0 | 0 | 4 | 3 | 4  | 4  | 6  |
| 62  | PLEC1     | splQ15149I | 532 kDa | 6 | 0 | 4 | 2 | 0 | 0 | 8  | 0  | 7  |
| 63  | RNASE7    | splQ9H1E1I | 17 kDa  | 6 | 2 | 4 | 3 | 0 | 0 | 3  | 2  | 3  |
| 64  | FABP5     | splQ01469I | 15 kDa  | 8 | 0 | 0 | 0 | 2 | 0 | 2  | 4  | 5  |
| 65  | ANXA1     | splP04083I | 39 kDa  | 0 | 2 | 0 | 0 | 0 | 0 | 10 | 5  | 8  |
| 66  | DSC3      | splQ14574I | 100 kDa | 5 | 0 | 0 | 5 | 2 | 4 | 5  | 2  | 6  |
| 67  | GSDMA     | splQ96QA5I | 49 kDa  | 5 | 2 | 5 | 0 | 0 | 0 | 5  | 3  | 2  |
| 68  | KRT79     | splQ5XKE5I | 58 kDa  | 2 | 0 | 0 | 0 | 0 | 0 | 5  | 9  | 3  |
| 69  | CRCT1     | splQ9UGL9I | 10 kDa  | 0 | 2 | 0 | 0 | 4 | 3 | 3  | 3  | 3  |
| 70  | CTSD      | splP07339I | 45 kDa  | 6 | 0 | 0 | 0 | 2 | 0 | 5  | 0  | 4  |
| 71  | ECM1      | splQ16610I | 61 kDa  | 6 | 3 | 0 | 0 | 0 | 0 | 2  | 2  | 0  |
| 72  | EEF2      | splP13639I | 95 kDa  | 2 | 0 | 0 | 0 | 0 | 0 | 5  | 6  | 9  |
| 73  | KRT9      | splP35527I | 62 kDa  | 0 | 3 | 6 | 8 | 6 | 3 | 0  | 0  | 0  |
| 74  | TUBA1A    | splQ71U36I | 50 kDa  | 0 | 0 | 0 | 0 | 0 | 0 | 6  | 7  | 10 |
| 75  | ACTN1     | splP12814I | 103 kDa | 3 | 0 | 0 | 0 | 0 | 0 | 7  | 11 | 5  |
| 76  | LDHA      | splP00338I | 37 kDa  | 0 | 0 | 0 | 0 | 0 | 0 | 6  | 5  | 6  |
| 77  | EPPK1     | splP58107I | 556 kDa | 2 | 0 | 0 | 0 | 0 | 0 | 4  | 4  | 9  |
| 78  | SFN       | splP31947I | 28 kDa  | 3 | 0 | 0 | 0 | 0 | 0 | 7  | 3  | 4  |
| 79  | PRDX1     | splQ06830I | 22 kDa  | 5 | 0 | 0 | 2 | 0 | 2 | 3  | 3  | 4  |
| 80  | EVPL      | splQ92817I | 232 kDa | 2 | 0 | 0 | 0 | 2 | 0 | 7  | 2  | 8  |
| 81  | RPS27A    | splP62988I | 9 kDa   | 3 | 3 | 2 | 2 | 0 | 0 | 3  | 3  | 3  |
| 82  | KRT15     | splP19012I | 49 kDa  | 0 | 0 | 2 | 4 | 0 | 0 | 3  | 0  | 3  |
| 83  | Elafin    | splP19957I | 12 kDa  | 0 | 0 | 0 | 0 | 3 | 0 | 2  | 3  | 3  |
| 84  | TUBB2C    | splP68371I | 50 kDa  | 0 | 0 | 0 | 0 | 0 | 0 | 6  | 3  | 8  |
| 85  | ALOX12B   | splO75342I | 80 kDa  | 3 | 0 | 4 | 3 | 2 | 0 | 5  | 3  | 2  |
| 86  | KRT3      | splP12035I | 65 kDa  | 0 | 0 | 0 | 2 | 0 | 0 | 0  | 0  | 2  |
| 87  | CLTC      | splQ00610I | 192 kDa | 0 | 0 | 0 | 0 | 0 | 0 | 5  | 3  | 9  |
| 88  | CDSN      | splQ15517I | 52 kDa  | 0 | 0 | 0 | 0 | 3 | 4 | 2  | 4  | 3  |
| 89  | CAT       | splP04040I | 60 kDa  | 4 | 9 | 3 | 0 | 0 | 0 | 0  | 2  | 2  |
| 90  | PPL       | splO60437I | 205 kDa | 2 | 0 | 0 | 0 | 3 | 0 | 7  | 0  | 3  |
| 91  | KRT74     | splQ7RTS7I | 58 kDa  | 2 | 0 | 0 | 3 | 0 | 0 | 2  | 2  | 0  |
| 92  | CSTA      | splP01040I | 11 kDa  | 3 | 2 | 3 | 2 | 0 | 0 | 2  | 0  | 2  |
| 93  | ALDOA     | splP04075I | 39 kDa  | 4 | 0 | 0 | 0 | 0 | 0 | 4  | 2  | 5  |
| 94  | TGM5      | splO43548I | 81 kDa  | 0 | 0 | 0 | 0 | 4 | 4 | 0  | 0  | 2  |
| 95  | CALML5    | splQ9NZT1I | 16 kDa  | 2 | 3 | 0 | 0 | 0 | 0 | 0  | 0  | 0  |
| 96  | CTNNB1    | splP35222I | 85 kDa  | 0 | 0 | 0 | 0 | 2 | 0 | 2  | 0  | 2  |
| 97  | NCCRP1    | splQ6ZVX7I | 31 kDa  | 4 | 2 | 3 | 2 | 0 | 0 | 0  | 0  | 0  |
| 98  | LCE2B     | splO14633I | 11 kDa  | 2 | 2 | 0 | 2 | 2 | 3 | 0  | 3  | 0  |
| 99  | HSP90AB1  | splP08238I | 83 kDa  | 0 | 0 | 0 | 0 | 0 | 0 | 3  | 3  | 3  |
| 100 | LMNA      | splP02545I | 74 kDa  | 4 | 0 | 0 | 0 | 0 | 0 | 3  | 3  | 0  |
| 101 | KRT19     | splP08727I | 44 kDa  | 0 | 0 | 0 | 0 | 0 | 0 | 2  | 2  | 0  |
| 102 | DSG3      | splP32926I | 108 kDa | 0 | 0 | 0 | 0 | 0 | 0 | 6  | 0  | 6  |
| 103 | HSPA8     | splP11142I | 71 kDa  | 2 | 0 | 0 | 0 | 0 | 0 | 2  | 4  | 2  |
| 104 | VCP       | splP55072I | 89 kDa  | 2 | 0 | 0 | 0 | 0 | 0 | 3  | 4  | 3  |
| 105 | VCL       | splP18206I | 124 kDa | 4 | 0 | 0 | 0 | 0 | 0 | 2  | 3  | 0  |
| 106 | YWHAZ     | splP63104I | 28 kDa  | 0 | 0 | 0 | 0 | 0 | 0 | 3  | 3  | 2  |
| 107 | DSC2      | splQ02487I | 100 kDa | 0 | 0 | 0 | 0 | 0 | 0 | 5  | 5  | 4  |
| 108 | FGB       | splP02675I | 56 kDa  | 0 | 0 | 0 | 0 | 0 | 0 | 5  | 0  | 4  |
| 109 | S100A11   | splP31949I | 12 kDa  | 4 | 0 | 0 | 0 | 2 | 0 | 0  | 2  | 4  |
| 110 | CAPN1     | splP07384I | 82 kDa  | 0 | 3 | 3 | 2 | 0 | 0 | 0  | 0  | 0  |
| 111 | ALOXE3    | splQ9BYJ1I | 81 kDa  | 3 | 2 | 0 | 3 | 0 | 0 | 0  | 0  | 0  |
| 112 | LCE1F     | splQ5T754I | 12 kDa  | 0 | 0 | 0 | 0 | 2 | 2 | 2  | 3  | 0  |
| 113 | SBSN      | splQ6UWP8I | 25 kDa  | 2 | 2 | 0 | 0 | 0 | 0 | 0  | 2  | 0  |
| 114 | HIST1H2AB | splP04908I | 14 kDa  | 0 | 0 | 0 | 0 | 0 | 0 | 3  | 2  | 2  |
| 115 | KRT4      | splP19013I | 57 kDa  | 0 | 0 | 0 | 4 | 0 | 0 | 0  | 2  | 0  |
| 116 | LCN2      | splP80188I | 23 kDa  | 0 | 0 | 0 | 0 | 0 | 0 | 3  | 3  | 4  |
| 117 | ALB       | splP02768I | 69 kDa  | 0 | 3 | 0 | 0 | 0 | 0 | 0  | 0  | 2  |
| 118 | LCE1A     | splQ5T7P2I | 11 kDa  | 0 | 0 | 0 | 0 | 0 | 2 | 3  | 2  | 0  |
| 119 | ALDOC     | splP09972I | 39 kDa  | 2 | 0 | 0 | 0 | 0 | 0 | 2  | 2  | 2  |
